# Supplementary material for: Impact of exposed crystal facets on oxygen reduction reaction activity in zeolitic imidazole frameworks
Source: Royal Society of Chemistry journal article supplement (doi:10.1039/d3dt02172f), 2023-01-01
Supplement: d3dt02172f1.pdf [file d3dt02172f1.pdf]

## Supplementary Material

# Impact of exposed crystal facets on oxygen reduction reaction activity in zeolitic imidazole framework

Sorawich Pimu<sup>a†</sup>, Nuttapon Yodsin<sup>b†</sup>, Sirawee Maneewan<sup>a</sup>, Jaruwan Kanthachan<sup>a</sup>,  
Supawadee Namuangruk<sup>b,\*</sup> and Kanokwan Kongpatpanich<sup>a,\*</sup>

*<sup>a</sup>Department of Materials Science and Engineering, School of Molecular Science and Engineering,*

*Vidyasirimedhi Institute of Science and Technology, Rayong 21210, Thailand. Email:*

*kanokwan.k@vistec.ac.th*

*<sup>b</sup>National Nanotechnology Center (NANOTEC), National Science and Technology Development Agency*

*(NSTDA), Pathum Thani 12120, Thailand. Email: supawadee@nanotec.or.th*

*† Both authors contributed equally to this work*

# S1. Methodology

## Experimental section

### 1. Chemicals

$\text{Co}(\text{NO}_3)_2 \cdot 6\text{H}_2\text{O}$  ( $\geq 99\%$ , Merck),  $\text{Co}(\text{OAc})_2 \cdot 4\text{H}_2\text{O}$  ( $\geq 98\%$ , Sigma-Aldrich), 2-methylimidazole (99%, Sigma-Aldrich), cetyltrimethylammonium bromide ( $\geq 98\%$ , Sigma-Aldrich), carbon black, super P conductive ( $\geq 99\%$ , Alfa aesar), nafion perfluorinated resin solution (5 wt% in mixture of lower aliphatic alcohols and water, contains 45% water, Merck), platinum, nominally 20% on carbon black (Alfa aesar), ethanol (99.9%, AR grade, Qrec), methanol (99.8%, AR grade, Qrec), Deionized water (Millipore Milli-Q grade). All of the chemicals used in this experiment were used as received without any further purification.

### 2. Synthesis methods

#### Synthesis of ZIF-67 (100)

$\text{Co}(\text{NO}_3)_2 \cdot 6\text{H}_2\text{O}$  (292 mg) and cetyltrimethylammonium bromide (4 mg) were dissolved in 10 mL of DI water (solution A). Then, the solution of 2-methylimidazole (4.54 g) in DI water (70 mL) (solution B) was rapidly added into solution A under stirring until homogenized. The mixture solution was kept at room temperature for 40 min. The purple powder was collected by centrifugation, washed with ethanol and dried at 80 °C overnight.

#### Synthesis of ZIF-67 (110)

$\text{Co}(\text{NO}_3)_2 \cdot 6\text{H}_2\text{O}$  (1.455 g) was dissolved in the 1:1 mixture of methanol and ethanol (80 mL) (solution A). 2-methylimidazole (1.642 g) was dissolved in another 1:1 mixture of methanol and ethanol (80 mL). Then, the solution A and B were mixed under stirring until homogenized. The mixture solution was kept at room temperature for 24 h. The purple powder was collected by centrifugation, washed with ethanol and dried at 80 °C overnight.

#### Synthesis of bulk ZIF-67

$\text{Co}(\text{OAc})_2$  (1.2 g) in DI water (10 mL) (solution A) was added into a solution of 2-methylimidazole (4.48 g) in DI water (10 mL) (solution B) under stirring until homogenized. The mixture solution was kept at room temperature for 15 min. The purple powder was collected by centrifugation, washed with methanol and dried at 80 °C overnight.

### 3. Materials characterization

Scanning electron microscopy (SEM) images were collected by JEOL JSM-7610F. The X-ray diffraction (XRD) was performed by a Bruker D8 ADVANCE X-ray diffractometer using Cu  $K\alpha$  radiation (40 kV, 40 mA,  $\lambda = 1.5418 \text{ \AA}$ ). Nitrogen ( $N_2$ ) adsorption experiments were determined with a MicrotracBEL BELSORP-mini II at  $-196 \text{ }^\circ\text{C}$ . All samples were activated at  $140 \text{ }^\circ\text{C}$  for 12 hours before gas adsorption experiments. Bruauer-Emmett-Teller (BET) method was used to calculate the surface area. The chemical environment was identified using X-ray photoelectron spectroscopy (XPS) data recorded on a JEOL JPS-9010MC with Mg  $K\alpha$  source (12 kV, 25 mA) and under a high vacuum pressure ( $10^{-7} \text{ Pa}$ ). All binding energy values were referenced to the C 1s peak ( $284.70 \text{ eV}$ ). All electrochemical analyses were performed on an Autolab PGSTAT302N, Metrohm. The  $^1\text{H}$  nuclear magnetic resonance ( $^1\text{H}$  NMR) spectra were recorded on a Bruker D8 AVANCE III HD (600 MHz) at room temperature. To digest the samples, 10 mg of MOF was soaking in the mixture of 15 mL 2%  $\text{H}_2\text{SO}_4$ , and 5 mL  $\text{H}_2\text{O}_2$  for 24 h. The filtrate solution (300  $\mu\text{L}$ ) was mixed with  $\text{DMSO-}d_6$  (300  $\mu\text{L}$ ) for NMR measurement.

#### 4. Electrochemical measurements

The electrocatalytic activity of each sample was tested using a three-electrode system. A glassy carbon rotating disk electrode (GC-RDE,  $0.07065 \text{ cm}^2$ ), platinum rod, and Ag/AgCl (3 M KCl) electrode were employed as the working electrode, counter electrode, and reference electrode, respectively. The catalyst ink was prepared by using the mixture of isopropanol (960  $\mu\text{L}$ ) and 5 wt% Nafion solution (40  $\mu\text{L}$ ) containing a catalyst (4 mg) and carbon black (4 mg), followed by ultrasonication for 30 min. Then, the catalyst ink (5  $\mu\text{L}$ ) was dropped onto the GC-RDE electrode and dried at room temperature for 18 h, so that the catalyst loading is  $0.28 \text{ mg}\cdot\text{cm}^{-2}$ . The benchmark 20 wt% Pt/C was used as the reference material and tested under the same catalyst loading. Linear sweep voltammetry (LSV) data were carried out in 0.1 M KOH solution saturated with  $\text{O}_2$  at a scan rate of  $5 \text{ mV}\cdot\text{s}^{-1}$  with a rotating speed of 400, 625, 900, 1225, 1600, 2025, and 2500 rpm. The background subtraction was performed under  $\text{N}_2$  saturation conditions under the same measurement. Tafel plots were calculated by measuring LSV data at a scan rate of  $5 \text{ mV}\cdot\text{s}^{-1}$  and 1600 rpm rotating speed. Cyclic voltammetry (CV) was performed from 1.00 to 1.10 V (vs RHE) to measure the electrochemical double-layer capacitance ( $C_{dl}$ ) at a non-faradaic region with variable scan rates of 20, 40, 60, 80, 100, 120, 140, 160, 180, and 200  $\text{mV}\cdot\text{s}^{-1}$ . Stability testing was conducted using the chronoamperometric technique in  $\text{O}_2$ -saturated

0.1 M KOH electrolyte with a rotation speed of 1600 rpm. All potentials measured from Ag/AgCl were converted to reversible hydrogen electrode (RHE) potentials by using the following Nernst equation

$$E_{\text{RHE}} = E_{\text{Ag/AgCl}} + 0.059\text{pH} + E^0_{\text{Ag/AgCl}} \quad (1)$$

The number of electrons ( $n$ ) of the ORR process was calculated by Koutecky-Levich (K-L) equation

$$1/J = 1/J_L + 1/J_K = 1/(B\omega^{1/2}) + 1/(nFkC_0) \quad (2)$$

$$B = 0.2nFC_0D_0^{2/3}\nu^{-1/6} \quad (3)$$

Where  $J$  is the current density measured with LSV,  $J_L$  and  $J_K$  are measured diffusion and kinetic-limiting of current density,  $B$  is the slope of K-L plots,  $\omega$  is the electrode rotating rate (rpm),  $n$  is the number of electrons transferred per oxygen molecule,  $F$  is the Faraday constant (96,485 C·mol<sup>-1</sup>),  $k$  is the electron transfer rate constant,  $C_0$  is the bulk concentration of O<sub>2</sub> (1.2×10<sup>-6</sup> mol·cm<sup>-3</sup>),  $D_0$  is the diffusion coefficient of O<sub>2</sub> (1.9×10<sup>-5</sup> cm<sup>2</sup>·s<sup>-1</sup>), and  $\nu$  is the kinetic viscosity of the electrolyte 0.1 M KOH (0.01 cm<sup>2</sup>·s<sup>-1</sup>). The constant 0.2 is adopted when the rotation speed is expressed in rpm.

## 5. DFT calculations

The calculations were performed by means of density functional theory (DFT) calculations with the Vienna *ab initio* simulation package (VASP)<sup>1-3</sup>. The electron exchange-correlation was represented by the Perdew–Burke–Ernzerhof (PBE) functional with generalized gradient approximation (GGA)<sup>4</sup>. The interaction between ion cores and valence electrons was ascribed by the projector augmented wave (PAW) method<sup>5</sup>, and we used Grimme’s dispersion correction (DFT-D3)<sup>6</sup>, to account for the van der Waals force. The kinetic energy cut-off for plane wave expansions was set to be 450 eV, and the reciprocal space was sampled by the  $\Gamma$  point. The convergence criteria are 1 x 10<sup>-5</sup> eV energy differences for the electronic wave function for structure optimization and vibrational frequency calculations. We fixed the catalyst and vibrated adsorbate, then we can collect the vibration frequency of different intermediates. T All atomic coordinates are converged to within 0.02 eV/Å for maximal components of forces.

The computational ZIF-67 bulk unit cell was a cubic cell from experimental crystallographic data.<sup>7</sup> These calculations gave a DFT-optimized lattice constant of 16.708 Å, in agreement with the experimental value (16.908 Å). Moreover, we compared structural

dimensions between simulation and experimental value, i.e., metal-nitrogen distance (D1), metal-metal distance (D2), and approximated pore aperture (PA), as demonstrated in **Figure S5**. Then, we used an optimized bulk ZIF-67 structure to generate a set of surface slab models by cleaving Co–N bonds crossing specified crystal plane. The slab model of (100) surfaces was modeled with truncations and a vacuum region of at least 16 Å to avoid the interaction with neighboring periodic cells. The simulation cell sizes of each facet are depicted in **Figure S6 and S7**. A four-layer slab in which the bottom two layers were fixed in bulk positions and the top two layers were allowed to relax was chosen to mimic the surface. In addition, the surface energy was investigated to clarify the most stable surface facets. The surface energy of the slab is defined as

$$E_s = \frac{1}{A} (E_{\text{slab}} - E_{\text{bulk}})$$

where A is the area of surface,  $E_{\text{slab}}$  is the energy of a slab, and  $E_{\text{bulk}}$  is the energy of bulk. By comparing the surface energy of all possible surface terminations, we have found that there are two possible (100) surface terminations, and the one that  $\text{Co}^{2+}$  atom coordinates to two imidazolates ( $E_s = 0.55 \text{ J/m}^2$ ) is much more stable rather than it is three imidazolates coordination ( $E_s = 1.19 \text{ J/m}^2$ ). In the case of (110) surfaces, we found only three imidazolates coordination as demonstrated in **Figure S6**.

ORR can normally take place in two ways: in a two-step 2e- pathway that reduces  $\text{O}_2$  to  $\text{H}_2\text{O}_2$ , or in a direct 4e- process that reduces  $\text{O}_2$  to  $\text{H}_2\text{O}$  directly. The associative 4e- reaction, each elementary reactions in basic condition in this study are (4) - (7)

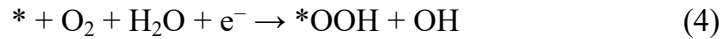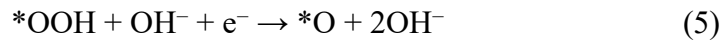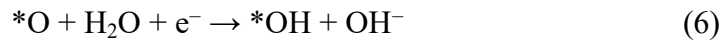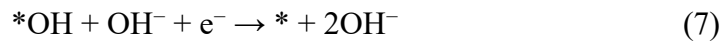

The ORR of 2 e mechanism comprises of elementary steps (8) and (9):

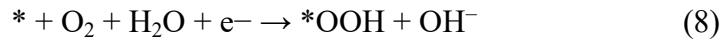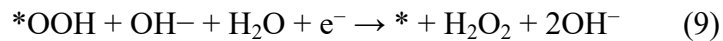

Therefore, the DFT adsorption energies of  $\text{OOH}^*$ ,  $\text{O}^*$ , and  $\text{OH}^*$  are calculated relative to  $\text{H}_2\text{O}$  and  $\text{H}_2$  molecular energies according to the following equations (10) - (12)

$$\Delta E_{\text{ads}}(\text{OOH}^*) = E_{\text{OOH}^*} - E^* - (2G_{\text{H}_2\text{O}} - 3/2G_{\text{H}_2}) \quad (10)$$

$$\Delta E_{\text{ads}}(\text{O}^*) = E_{\text{O}^*} - E^* - (G_{\text{H}_2\text{O}} - G_{\text{H}_2}) \quad (11)$$

$$\Delta E_{ads}(\text{OH}^*) = E_{\text{OH}^*} - E^* - (G_{\text{H}_2\text{O}} - 1/2G_{\text{H}_2}) \quad (12)$$

The Gibbs free energy (G) of the intermediates can be calculated as:

$$G = \Delta E_{ads} + \Delta E_{\text{ZPE}} - T\Delta S + \int C_p dT + G_U \quad (13)$$

where  $\Delta E_{ads}$  is calculated from equations (10) - (12),  $\Delta E_{\text{ZPE}}$ ,  $T\Delta S$ , and  $\int C_p dT$  referred to the change in zero-point energies, the change in entropy at temperature T, and the enthalpic temperature correction. The Gibbs free energies of gas-phase molecules are calculated from **Table S3**. We corrected by the vibrational frequency calculations at 298.15 K.  $\Delta G_U$  represent the change in the difference in electrode potential of the electrochemical ORR reaction, which can be calculated by  $\Delta G_U = -neU$ , where n, e and U are the number of transferred electrons, the electron charge, and applied potential to the reaction, accordingly. When there is no applied potential in the reaction, the  $\Delta G_U$  is zero.

The Gibbs free energy changes ( $\Delta G$ ) of each ORR step on ZIF-67 are calculated by the following equations:

$$\Delta G_1 = G_{\text{OOH}^*} - 4.92 \text{ eV} \quad (14)$$

$$\Delta G_2 = G_{\text{O}^*} - G_{\text{OOH}^*} \quad (15)$$

$$\Delta G_3 = G_{\text{OH}^*} - G_{\text{O}^*} \quad (16)$$

$$\Delta G_4 = G_{\text{OH}^*} \quad (17)$$

Because DFT methods cannot precisely compute the energy of the triplet  $\text{O}_2$  molecule, the Gibbs free energy of  $\text{O}_2$  is then set as 4.92 eV from the formation free energy of two water molecules:  $2\text{H}_2\text{O} \rightarrow \text{O}_2 + 2\text{H}_2$ . The Gibbs free energy of each intermediate state of the ORR reactions is performed following the computational hydrogen electrode (CHE) method suggested by Nørskov et al.<sup>8</sup>, which approximate the free energy of a proton and an electron by half the free energy of a hydrogen molecule at  $U = 0 \text{ V}$  vs. RHE.

Additionally, the overpotential ( $\eta$ ) are important factors for evaluating the catalytic activity, the minimum ORR overpotential  $\eta^{\text{ORR}}$  can be defined as:

$$\eta^{\text{ORR}} = 1.23 \text{ V} - \min(\Delta G_1, \Delta G_2, \Delta G_3, \Delta G_4)/e \quad (18)$$

Specifically, an ideal electrocatalyst requires all  $\Delta G_i$  approximately 1.23 eV to confirm that the ORR can spontaneously proceed just above the equilibrium potential.

## S2. Additional results

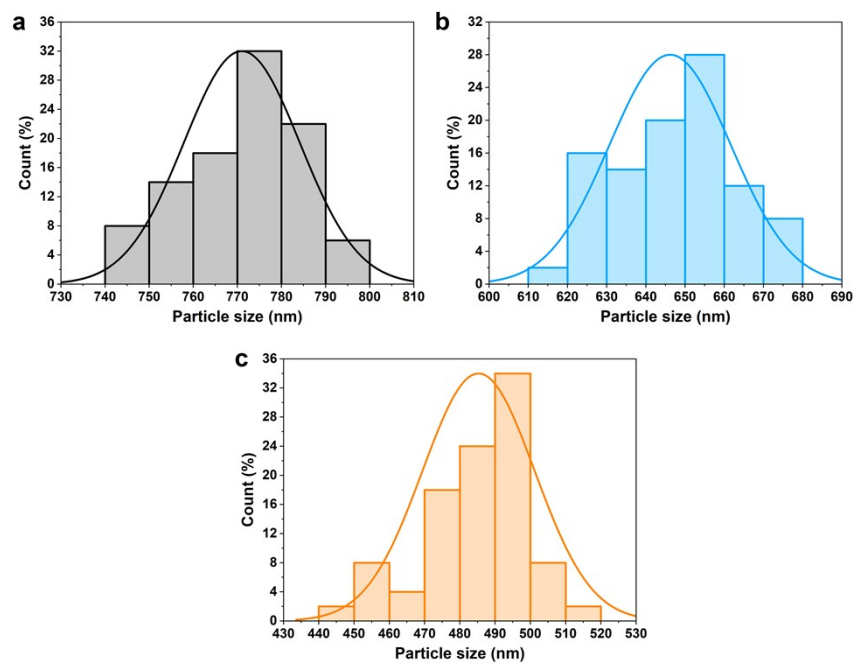

**Fig. S1** Particle size distribution of (a) bulk (b) rhombic and (c) cubic ZIF-67.

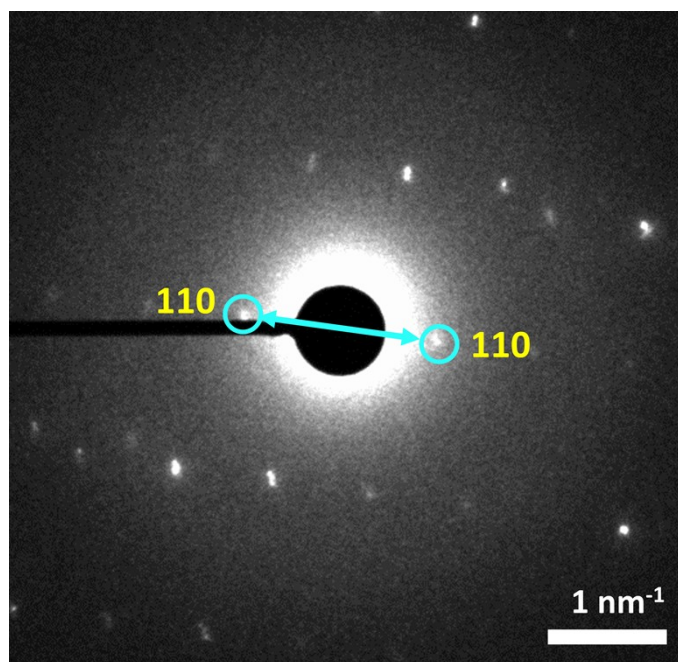

**Fig. S2** SAED image of ZIF-67 rhombic.

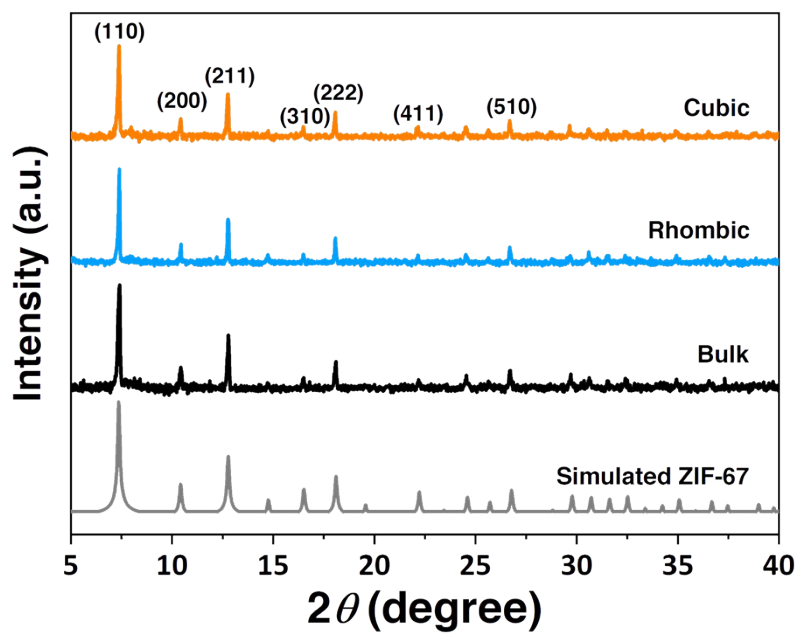

Fig. S3 XRD patterns of all ZIF-67 samples compared to the simulated pattern of ZIF-67.

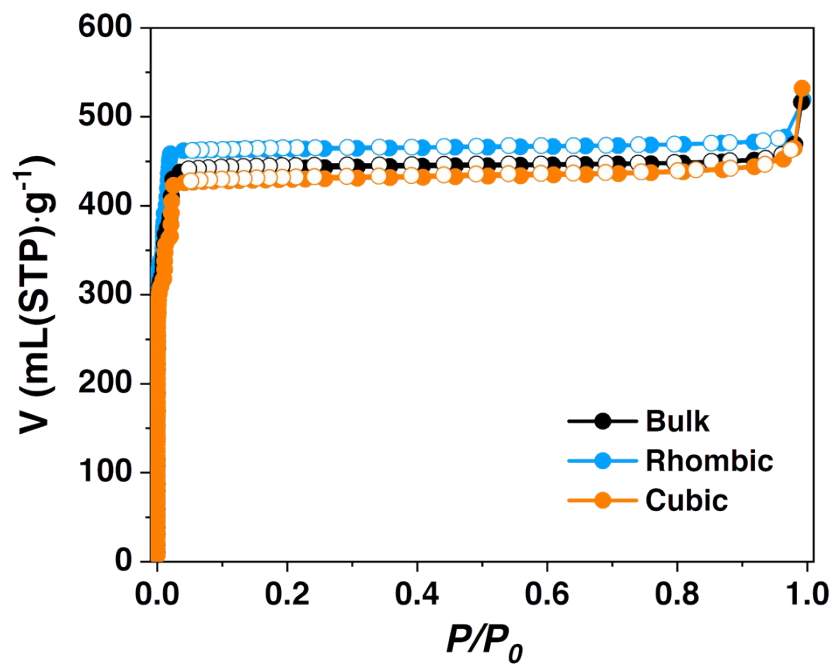

Fig. S4 N<sub>2</sub> adsorption isotherms of all ZIF-67 sample.



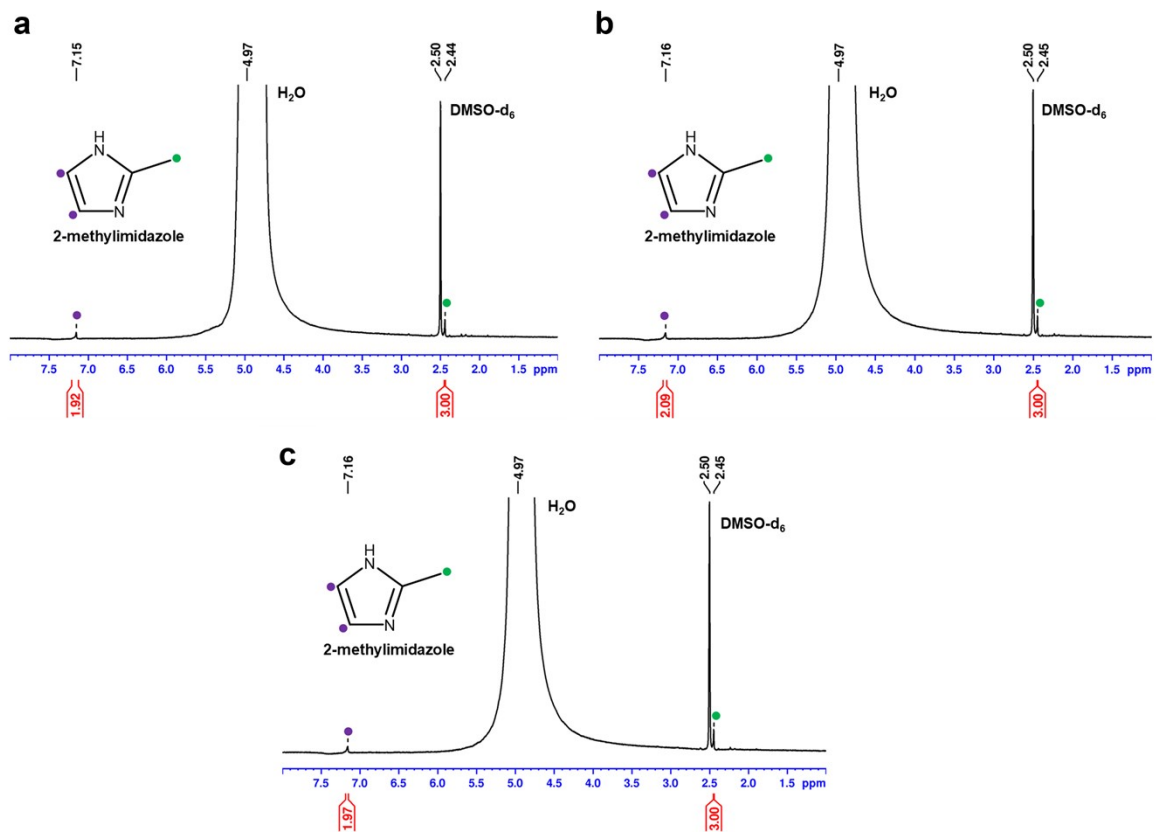

Fig. S5  $^1\text{H-NMR}$  spectra of the digested ZIF-67 samples after soaking of (a) bulk (b) rhombic and (c) cubic.

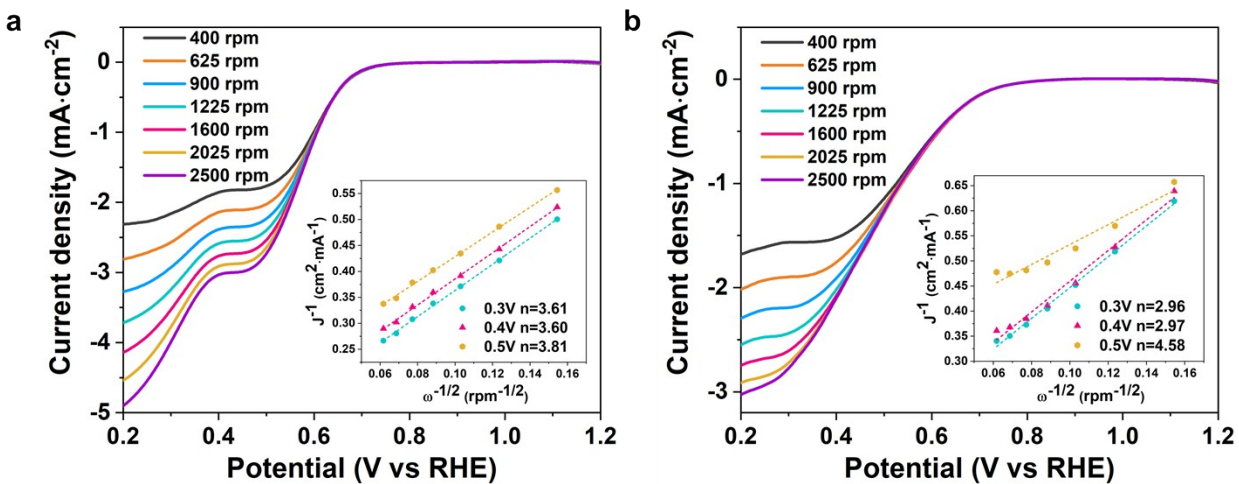

Fig. S6 Electron transfer number of ZIF-67 (a) bulk and (b) rhombic.

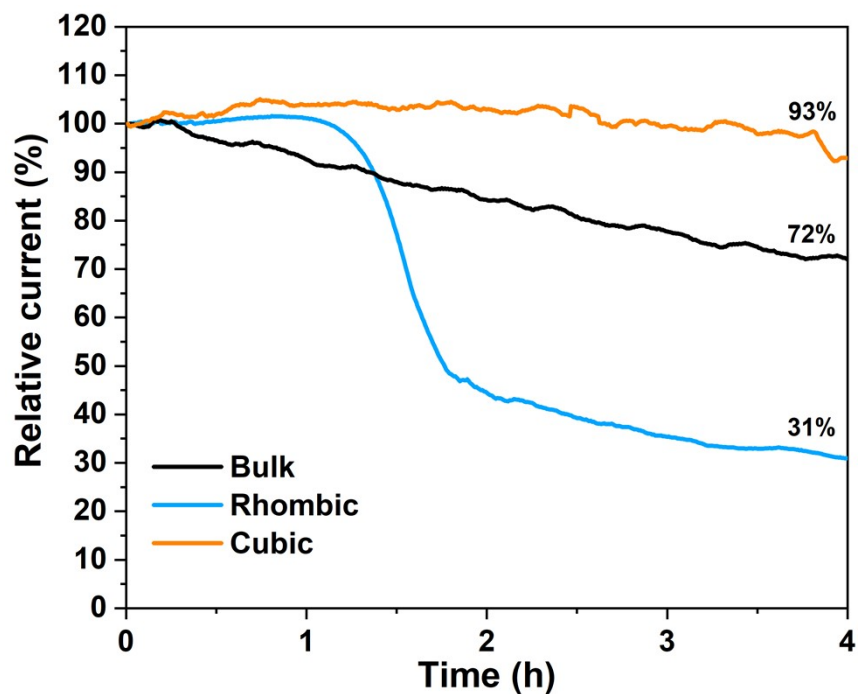

**Fig. S7** Stability test of all ZIF-67 samples at 0.46 V (vs RHE) and 1600 rpm in O<sub>2</sub>-saturated 0.1 M KOH solution.

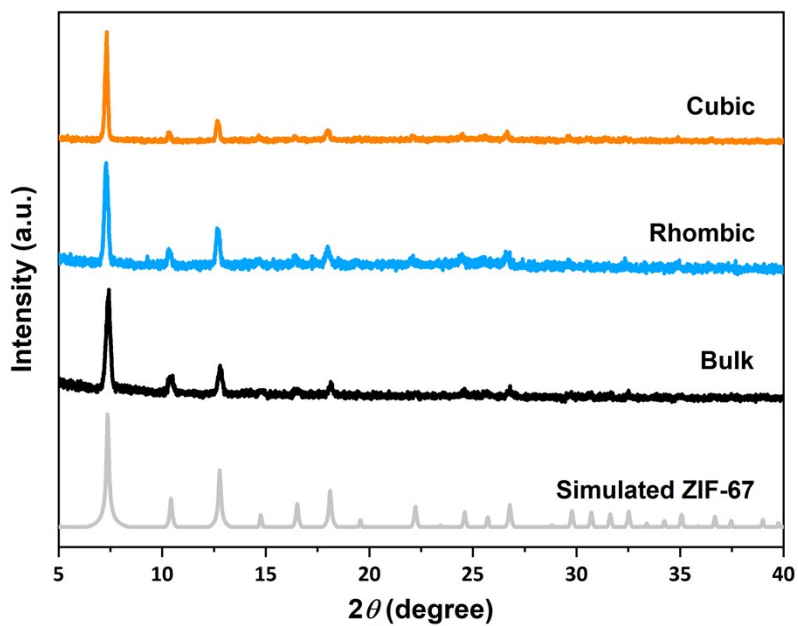

**Fig. S8** XRD patterns of all ZIF-67 samples after ORR performance compared to the simulated pattern of ZIF-67.

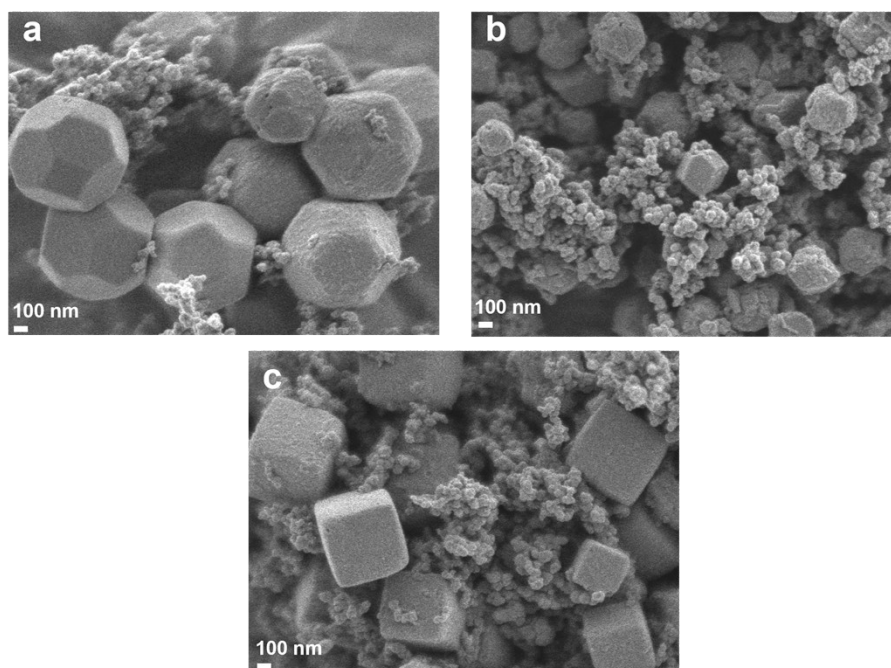

**Fig. S9** SEM image of (a) bulk, (b) rhombic and (c) cubic after being used as a catalyst in ORR. Small particles observed in SEM are carbon black, which is added to MOF ink during the thin film preparation to increase the conductivity.

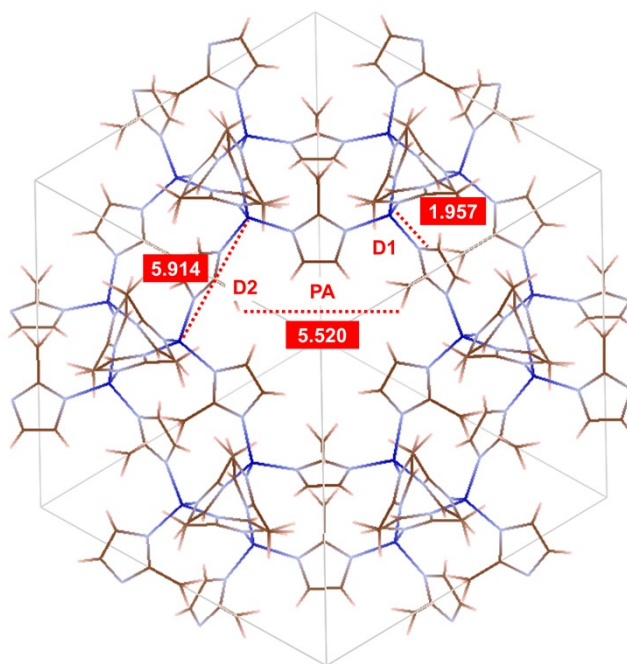

**Fig. S10** Structural properties of bulk ZIF-67 with a crucial bond distance.

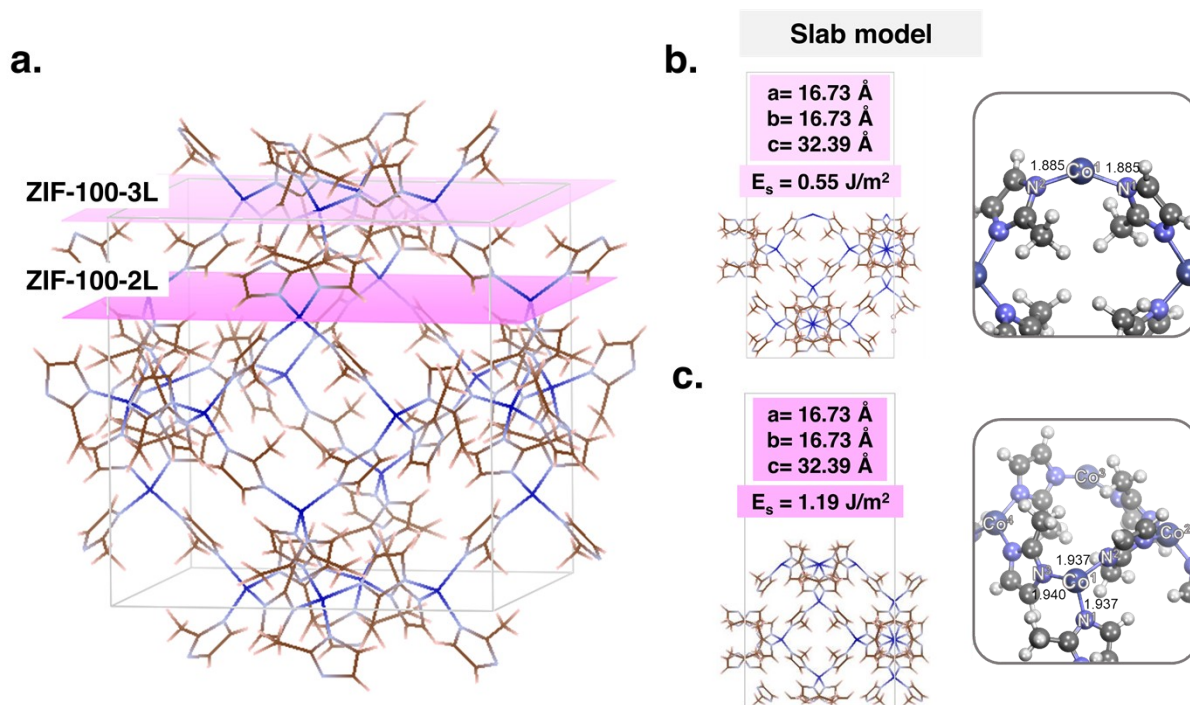

**Fig. S11** (a.) Schematic representation of the exposed crystal facets in (b.) ZIF-100-2L and (c.) ZIF-100-3L facets.

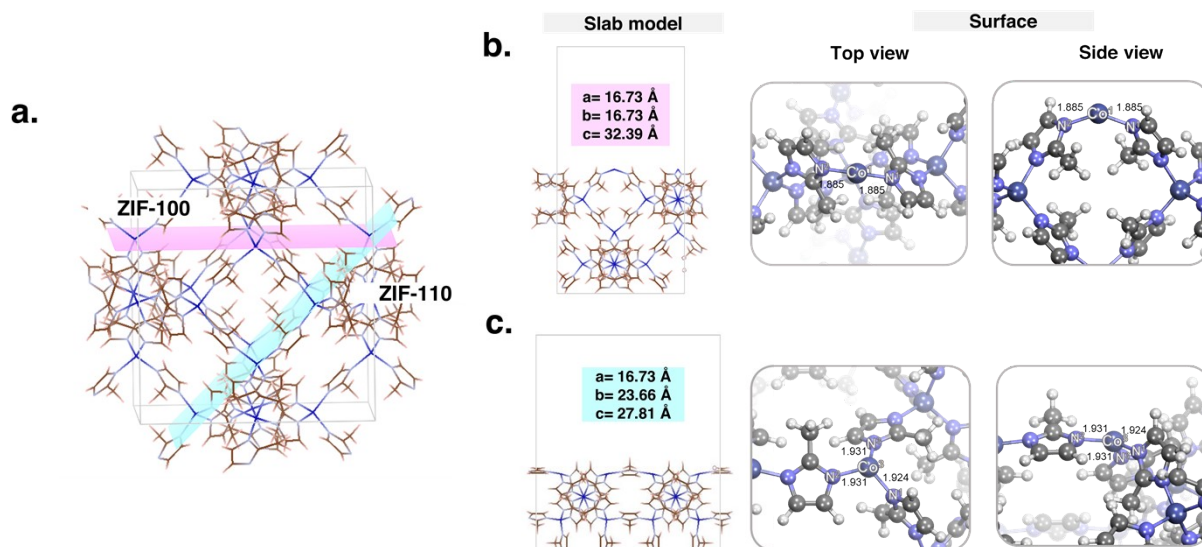

**Fig. S12** (a.) Schematic representation of the exposed ZIF-67 crystal facets with different

facets representing the structural configuration of (b.) ZIF-100 and (c.) ZIF-110.

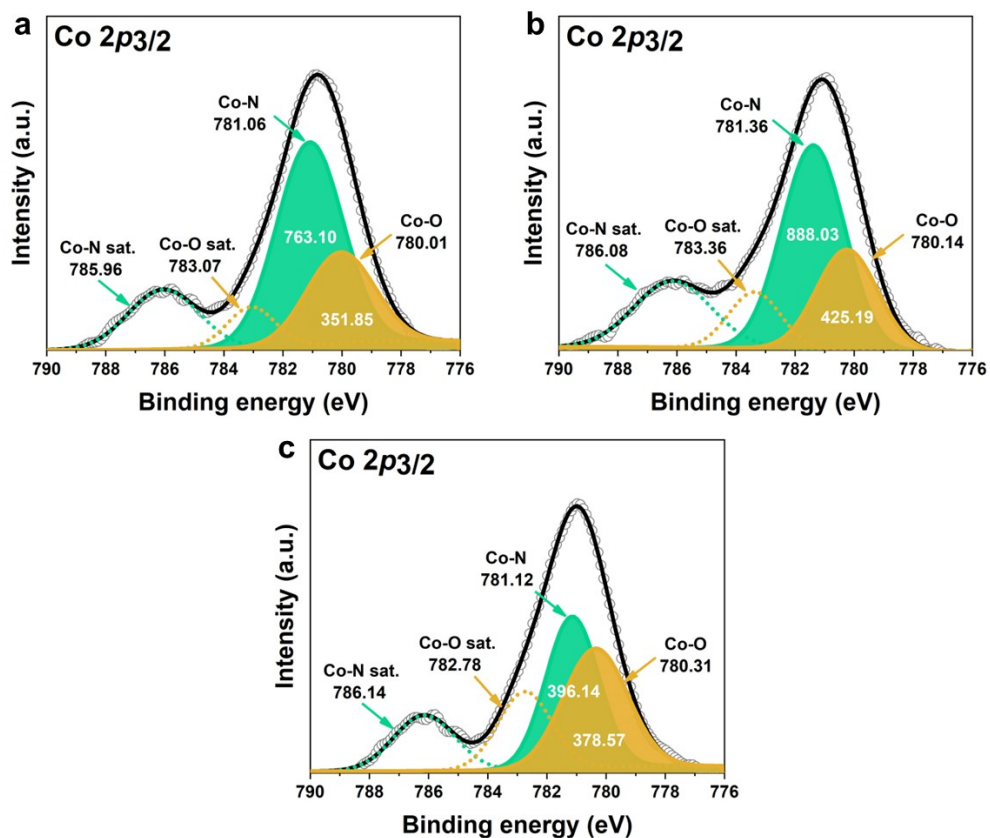

Fig. S13 XPS spectra of Co 2p<sub>3/2</sub> of (a.) bulk ZIF-67 (b) rhombic ZIF-67 (c) cubic ZIF-67.

Table S1 The calculation of coordination number of all ZIF-67 samples from XPS

| Sample        | Area of Co-O | Area of Co-N | Number of Co-N* | Number of Ligand per metal center |
|---------------|--------------|--------------|-----------------|-----------------------------------|
| Bulk          | 351.85       | 763.10       | 2.74            | 3                                 |
| Rhombic (110) | 425.19       | 888.03       | 2.70            | 3                                 |
| Cubic (100)   | 378.57       | 396.14       | 2.04            | 2                                 |

$$\frac{\text{*No of Co-N bond} \times \text{Area of Co - N bond}}{\text{Total area}} =$$

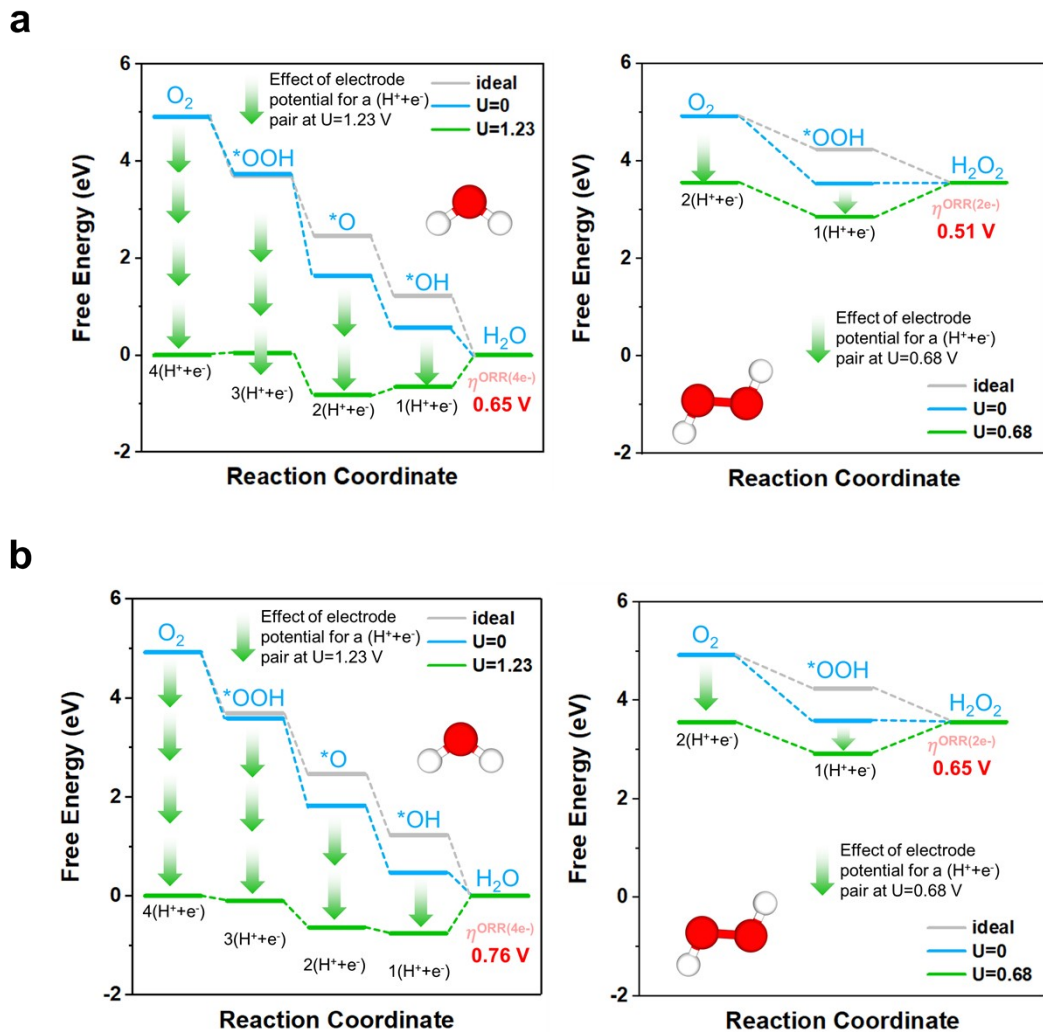

**Fig. S14** The free energy diagrams of 4e<sup>-</sup> and 2e<sup>-</sup> ORR pathway of (a) ZIF-67 (100) (b) ZIF-67 (110) at U = 0 V and U = 1.23 V.

**Table S2** Comparison of structural dimensions between ZIF-67 of previous and our work. D1, D2, and PA denote metal-nitrogen distance, metal-metal distance, and approximated pore aperture, respectively.

| <b>Bulk</b>        | <b>D1 (Å)</b> | <b>D2 (Å)</b> | <b>PA (Å)</b> | <b>Unit cell (Å)</b> |
|--------------------|---------------|---------------|---------------|----------------------|
| ZIF-8              | 1.979         | 5.969         | 5.567         | 16.881               |
| ZIF-67             | 1.977         | 5.978         | 5.581         | 16.908               |
| ZIF-67 (this work) | 1.957         | 5.914         | 5.520         | 16.728               |

**Table S3** The thermodynamic data for the molecules considered in this paper

| <b>Isolated gas</b> | <b>E (eV)</b> | <b>ZPE (eV)</b> | <b>TS (eV)</b> | <b><math>\int C_p dT</math> (eV)</b> | <b>Chemical potential</b> | <b>G (eV)</b> |
|---------------------|---------------|-----------------|----------------|--------------------------------------|---------------------------|---------------|
| H <sub>2</sub>      | -6.77         | 0.27            | 0.40           | 0.09                                 |                           | -6.81         |
| H <sub>2</sub> O    | -14.22        | 0.57            | 0.58           | 0.10                                 | -0.09                     | -14.22        |

Our thermodynamic data for the molecules considered in this paper are corresponding to our previous works.<sup>9-11</sup>

**Table S4** The overpotential of each ZIF-67 facet, Free energy adsorption, bond distance between surface and adsorbed species ( $d(\text{Co-O})$ ), Bader charge of Co ( $q(\text{Co})$ ) and adsorbed species ( $q(\text{Species})$ ). The negative and positive values stand for the accumulation and donation of electrons, respectively.

| <b>Plane</b> | <b>Overpotential (V)</b> | <b>Species</b> | <b>G<sub>ads</sub></b> | <b>d(Co-O)</b> | <b>q(Co)</b> | <b>q(Species)</b> |
|--------------|--------------------------|----------------|------------------------|----------------|--------------|-------------------|
| 100          | 0.65                     | OOH            | 3.73                   | 1.809          | 1.13         | -0.61             |
|              |                          | O              | 1.64                   | 1.679          | 1.23         | -0.77             |
|              |                          | OH             | 0.58                   | 1.856          | 0.74         | -0.60             |
| 110          | 0.76                     | OOH            | 3.59                   | 1.828          | 0.67         | -0.43             |
|              |                          | O              | 1.82                   | 1.684          | 1.26         | -0.74             |
|              |                          | OH             | 0.47                   | 1.831          | 1.23         | -0.55             |

## References

1. G. Kresse and J. Hafner, *Phys. Rev. B.*, 1993, **47**, 558.
2. G. Kresse and J. Furthmüller, *Comput. Mater. Sci.*, 1996, **6**, 15-50.
3. G. Kresse and J. Furthmüller, *Phys. Rev. B.*, 1996, **54**, 11169.
4. J. P. Perdew, K. Burke and M. Ernzerhof, *Phys. Rev. Lett.*, 1996, **77**, 3865.
5. G. Kresse and D. Joubert, *Phys. Rev. B.*, 1999, **59**, 1758.
6. S. Grimme, J. Antony, S. Ehrlich and H. Krieg, *Chem. Phys.*, 2010, **132**, 154104.
7. H. T. Kwon, H.-K. Jeong, A. S. Lee, H. S. An and J. S. Lee, *J. Am. Chem. Soc.*, 2015, **137**, 12304-12311.
8. J. K. Nørskov, J. Rossmeisl, A. Logadottir, L. Lindqvist, J. R. Kitchin, T. Bligaard and H. Jónsson, *J. Phys. Chem. B.*, 2004, **108**, 17886-17892.
9. S. Chen, H. Yuan, S. I. Morozov, L. Ge, L. Li, L. Xu and W. A. Goddard, *J. Phys. Chem. Lett.*, 2020, **11**, 2541-2549.
10. C. Adhikari, A. Das and A. Chakraborty, *Mol. Pharm.*, 2015, **12**, 3158-3166.
11. Y. Ying, K. Fan, X. Luo, J. Qiao and H. Huang, *J. Mater. Chem. A*, 2021, **9**, 16860-16867.
